# Supplementary material for: Palladium nanoparticles immobilized on core–shell magnetic fibers as a highly efficient and recyclable heterogeneous catalyst for the reduction of 4-nitrophenol and Suzuki coupling reactions
Source: Royal Society of Chemistry journal article supplement (doi:10.1039/c4ta04919e), 2014-01-01
Supplement: c4ta04919e1.pdf [file c4ta04919e1.pdf]

**Palladium nanoparticles immobilized on core-shell magnetic fibrous as highly efficient and recyclable heterogeneous catalyst for reduction of 4-nitrophenol and Suzuki coupling reactions**

Xuandung Le,<sup>a</sup> Zhengping Dong,<sup>\*a</sup> Yansheng Liu,<sup>a</sup> Zhicheng Jin,<sup>a</sup> Huy-Thanh Do,<sup>b</sup> Minhdong Le<sup>b</sup> and Jiantai Ma<sup>\*a</sup>

<sup>a</sup>*Gansu Provincial Engineering Laboratory for Chemical Catalysis, College of Chemistry and Chemical Engineering, Lanzhou University, Lanzhou 730000, PR China.*

<sup>b</sup>*Faculty of Technical Physics and Chemistry, Le Quy Don Technical University, Hanoi, Vietnam.*

*\* Corresponding author, E-mail addresses: dongzhp@lzu.edu.cn (Zhengping Dong), majiantai@lzu.edu.cn (Jiantai Ma).  
Tel.: +86 0931 891 2311; Fax: +86 0931 891 2582.*

**List of Contents:**

**Fig. S1** UV-Vis spectra of 4-NP/NaBH<sub>4</sub> solution when adding Fe<sub>3</sub>O<sub>4</sub>@SiO<sub>2</sub>@KCC-1 as catalyst at the reaction time of about 0 h and 2 h, inset image the colour change of the 4-NP/NaBH<sub>4</sub>/Fe<sub>3</sub>O<sub>4</sub>@SiO<sub>2</sub>@KCC-1 mixture at the reaction time of about 0 h and 2 h.

**Table 1** The control reactions of Fe<sub>3</sub>O<sub>4</sub>@SiO<sub>2</sub>@mSiO<sub>2</sub> and Fe<sub>3</sub>O<sub>4</sub>@SiO<sub>2</sub>@mSiO<sub>2</sub>-Pd(II) catalyst in the cross coupling reaction between 1-Iodo-4-nitrobenzene and phenylboronic acid were carried out.

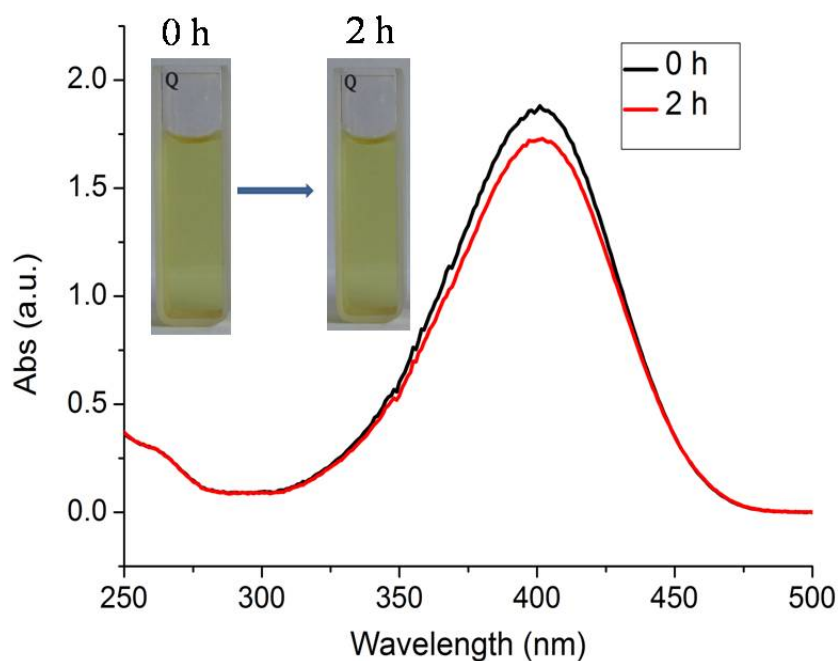

**Fig. S1** UV-Vis spectra of 4-NP/NaBH<sub>4</sub> solution when adding Fe<sub>3</sub>O<sub>4</sub>@SiO<sub>2</sub>@KCC-1 as catalyst at the reaction time of about 0 h and 2 h, inset image the colour change of the 4-NP/NaBH<sub>4</sub>/Fe<sub>3</sub>O<sub>4</sub>@SiO<sub>2</sub>@KCC-1 mixture at the reaction time of about 0 h and 2 h.

**Table 1**

The control reactions of Fe<sub>3</sub>O<sub>4</sub>@SiO<sub>2</sub>@KCC-1 and Pd/Fe<sub>3</sub>O<sub>4</sub>@SiO<sub>2</sub>@KCC-1 catalyst in the cross coupling reaction between 1-Iodo-4-nitrobenzene and phenylboronic acid were carried out.

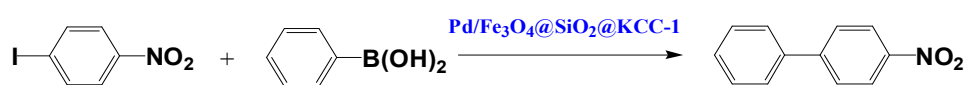

| Entry | Catalyst                                                   | Time (h) | Yield (%) |
|-------|------------------------------------------------------------|----------|-----------|
| 1     | Fe <sub>3</sub> O <sub>4</sub> @SiO <sub>2</sub> @KCC-1    | 3        | --        |
| 2     | Pd/Fe <sub>3</sub> O <sub>4</sub> @SiO <sub>2</sub> @KCC-1 | 3        | 97        |

<sup>a</sup> Reaction condition: aryl halide (0.5 mmol), aryl boronic acid (0.75 mmol), base (1.0 mmol), ethanol 5.0 mL, 0.01 g catalyst, in air, 3 h.

<sup>b</sup> Yield was determined by GC analysis.
